# Supplementary material for: Intestinal Epithelial Cells Respond to Chronic Inflammation and Dysbiosis by Synthesizing H2O2
Source: PubMed Central journal article supplement (PMC6921703; doi:10.3389/fphys.2019.01484), 2019-12-12
Supplement: Image_1.pdf [file Image_1.pdf]

## Supplementary Material

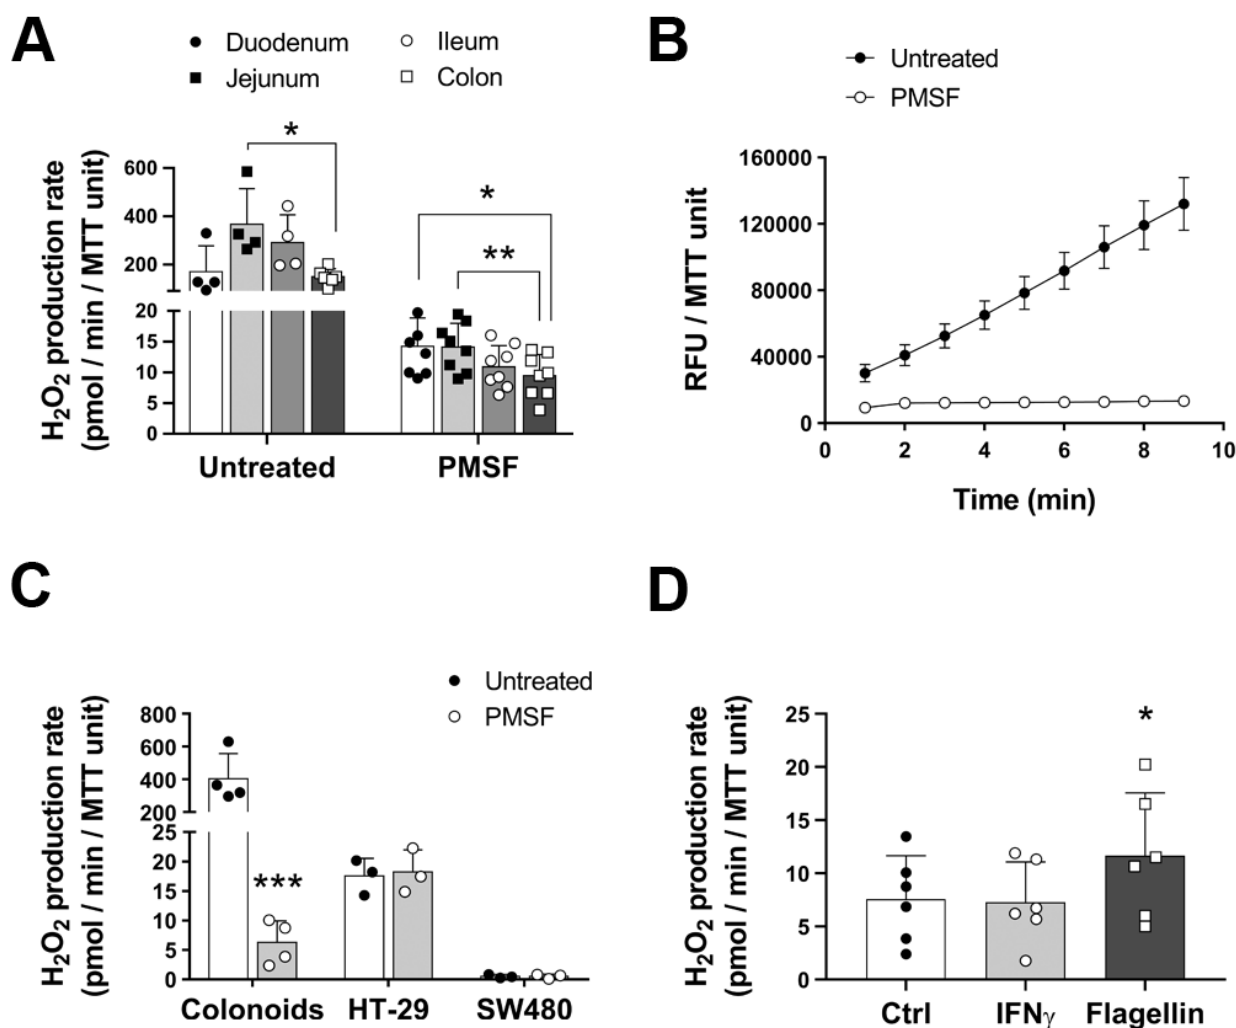

**Supplemental Figure 1. Inhibition of carboxylesterases exposes epithelial H<sub>2</sub>O<sub>2</sub> production by murine and human IECs.** Epithelial production of H<sub>2</sub>O<sub>2</sub> was determined in IECs isolated from the different segments of the murine gut or in cultures of human primary IECs. **A)** AR oxidation rate in mouse IECs from duodenum, jejunum, ileum, and colon in the presence or absence of PMSF. Duodenum vs colon, \* $P < 0.05$ ; jejunum vs colon, \*\* $P < 0.01$  as determined by one-way ANOVA followed by Tukey's post-hoc test ( $n = 8$  mice). Two-way ANOVA additionally identified PMSF treatment as a significant source of variability ( $P < 0.001$ ). **B)** Representative experiment showing real-time oxidation kinetics of AR in cultured human colonoids in the presence or absence of PMSF. **C)** AR oxidation rate in human colonoids and the human IEC lines HT-29 and SW480 in the presence or absence of PMSF. Colonoids-PMSF vs colonoids-untreated, \*\*\* $P < 0.001$  as determined by two-way ANOVA followed by Sidak's post-hoc test ( $n = 3-4$  cultures). **D)** H<sub>2</sub>O<sub>2</sub> production rate in human colonoids in response to IFN $\gamma$  and flagellin. Flagellin vs control,  $P < 0.05$  as determined by one-way ANOVA with matched data analysis followed by Dunnett's post-hoc test ( $n = 6$  colonoid cultures).

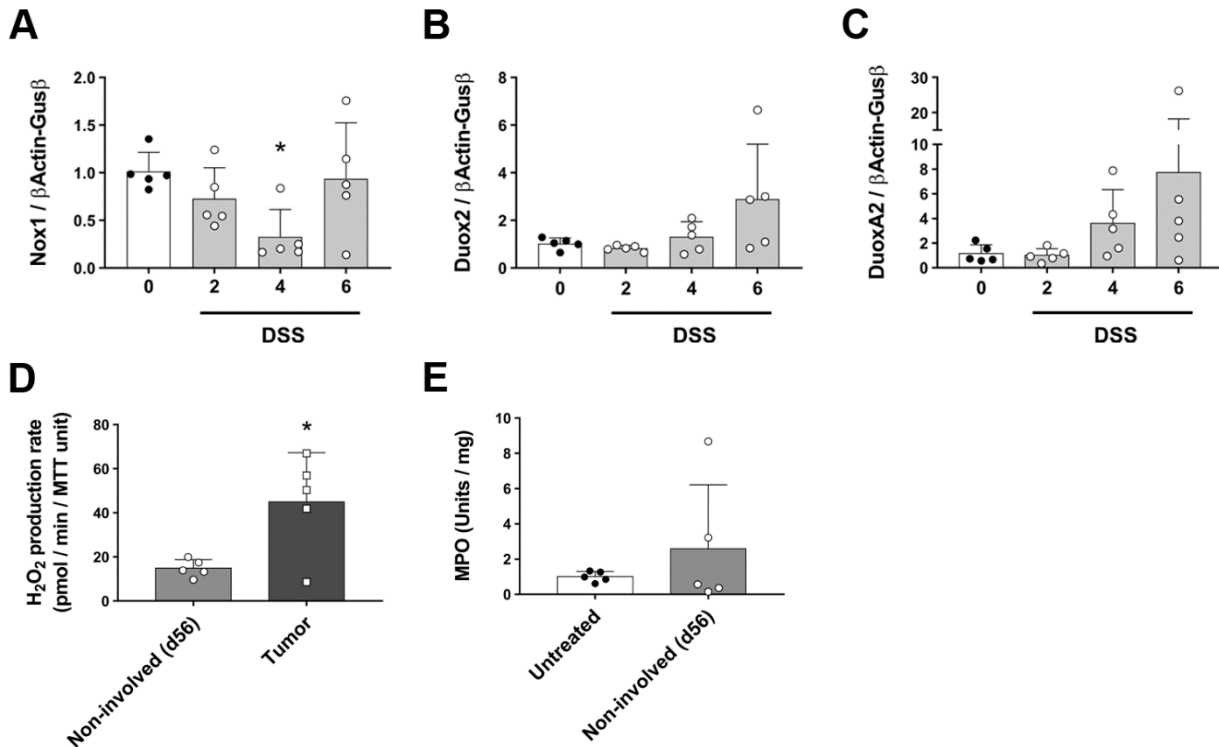

**Supplemental Figure 2. Acute inflammation does not consistently upregulate NADPH oxidases.** The expression of NADPH oxidases Nox1 (A), Duox2 (B), and DuoxA2 (C) in mouse IEC was determined during acute DSS colitis. Nox1 day4 vs day0, \* $P < 0.05$  as determined by one-way ANOVA followed by Dunnett's post-hoc test ( $n = 5$  mice). In addition, isolated IECs and their matched colon sections from mice undergoing the AOM-DSS model were analyzed for their production of H<sub>2</sub>O<sub>2</sub>. D) H<sub>2</sub>O<sub>2</sub> production rate in IECs isolated from tumors and non-involved areas. Tumor vs non-involved, \* $P < 0.05$  as determined by two-tailed Student's t-test ( $n = 5$  mice). E) MPO activity in colon sections of untreated mice and non-involved areas on day 56 of AOM-DSS model.

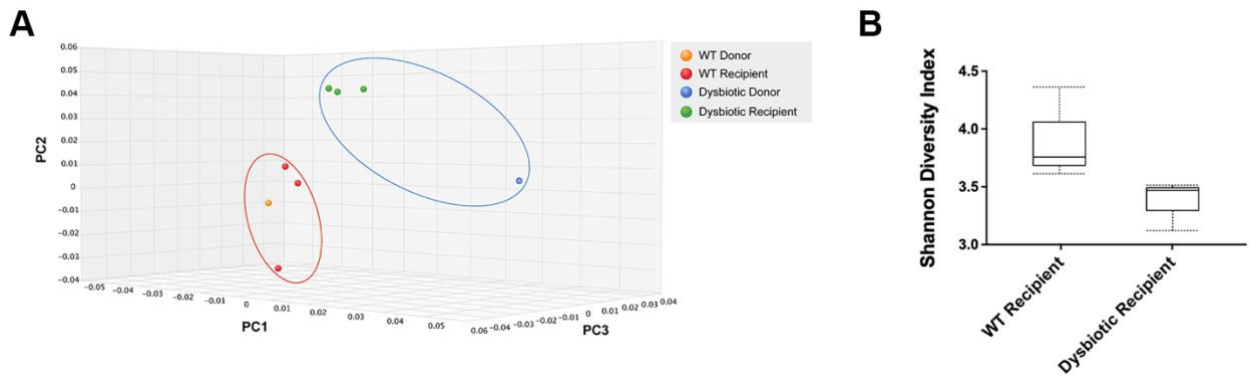

**Supplemental Figure 3. Transfer of mucosa-associated microbiota from dysbiotic donor mice leads to dysbiosis in recipient mice.** Following engraftment of mucosa-associated microbiota, 16S rRNA gene surveys from both donor and recipient mice were analyzed to validate the engraftment and confirm dysbiosis. **A)** Principal coordinate analysis of WT and dysbiotic donors and their corresponding recipients at the genus level. Principal coordinate 1 (PC1), PC2, and PC3 are scaled on the basis of percent variance. **B)** Shannon diversity indices of bacterial communities in recipient mice (n=3 mice).

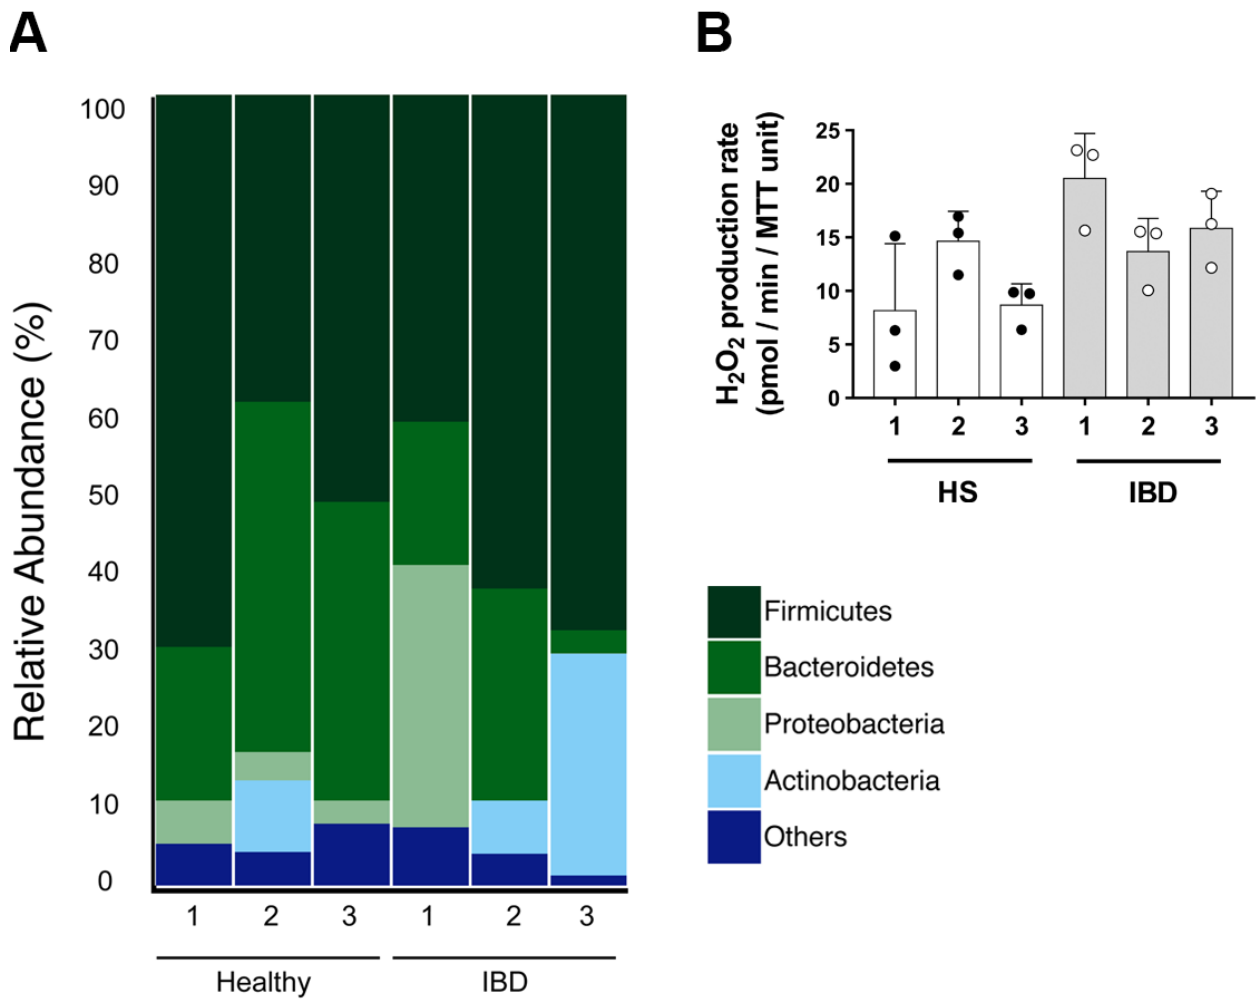

**Supplemental Figure 4. Higher abundance of facultative anaerobes in human donor microbiota elicits increased epithelial production of H<sub>2</sub>O<sub>2</sub> in recipient germ free mice.** The epithelial production of H<sub>2</sub>O<sub>2</sub> was evaluated in humanized germ-free mice engrafted with the stool microbiota of healthy subjects or IBD patients. Results are segregated by human donor. **A)** Taxonomic distribution (phylum level taxa) of the stool from healthy subjects and IBD patients. Values represent the average relative abundance from each sample. **B)** H<sub>2</sub>O<sub>2</sub> production rate in IECs isolated from engrafted mice (n=3 mice per subject).
